# Supplementary material for: LncPLAAT3-AS Regulates PLAAT3-Mediated Adipocyte Differentiation and Lipogenesis in Pigs through miR-503-5p
Source: MDPI journal article supplement (doi:10.3390/genes14010161), 2023-01-06
Supplement: s1 [file s1]

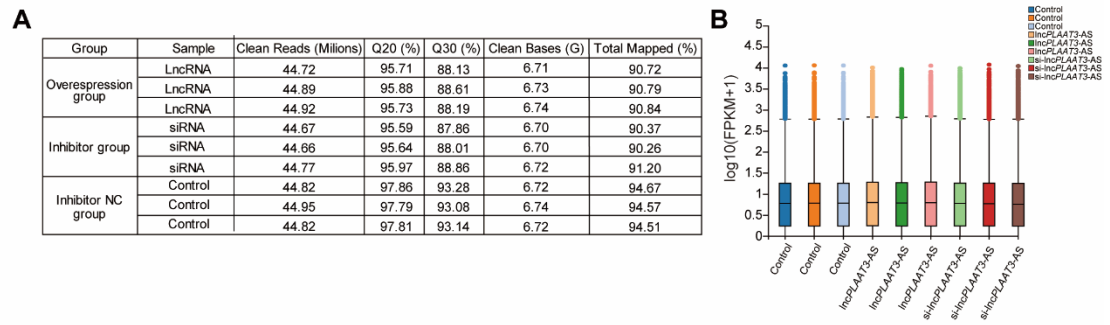

**Figure S1 (A)** mRNA sequencing data reads quality statistics; **(B)** Boxplot of mRNA sequencing expression in transfected cells.

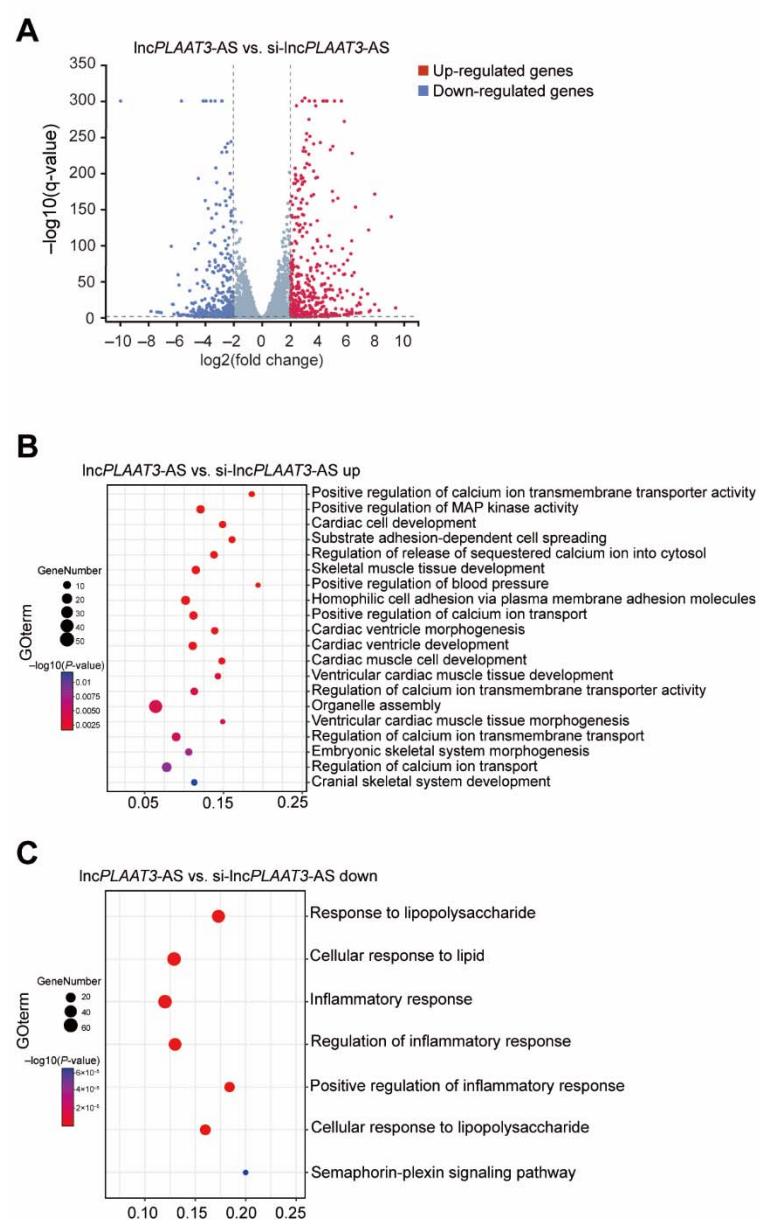

**Figure S2** (A) Differentially expressed gene volcano plot; (B~C) The top 20 KEGG pathways of differential genes. Sequentially for IncPLAAT3-AS vs si-IncPLAAT3-AS differential genes with up-regulated expression, IncPLAAT3-AS vs si-IncPLAAT3-AS differential genes with down-regulated expression.

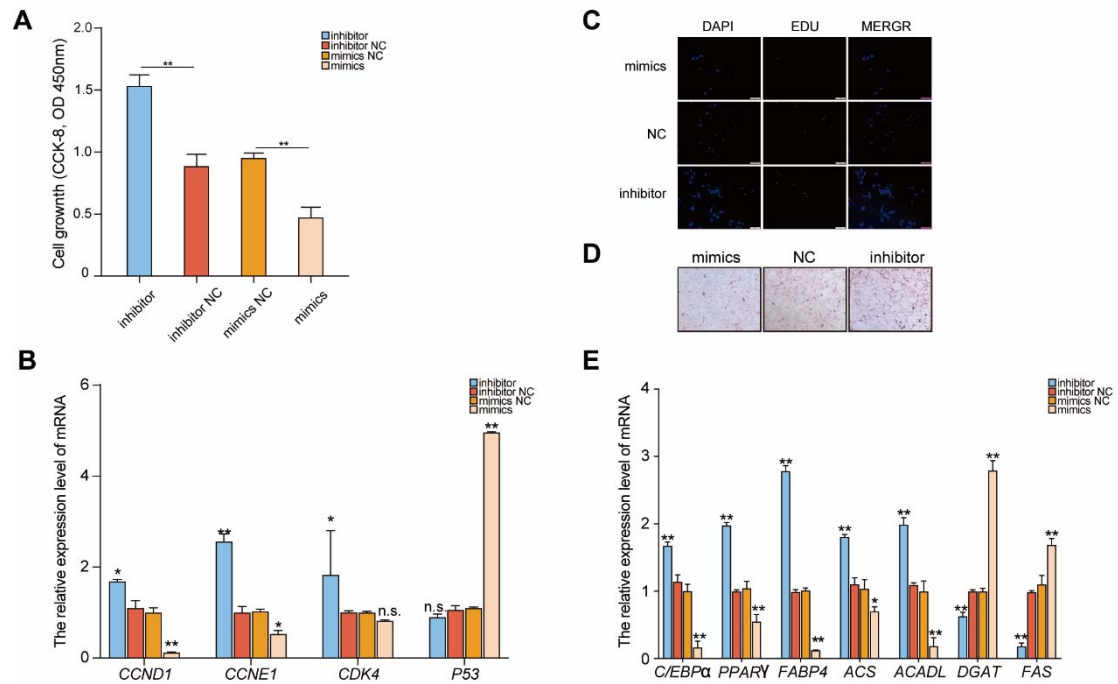

**Figure S3** (A) cell proliferation was evaluated at 24 h of proliferation by performing CCK-8, miR-503-5p mimic negative control for miR-503-5p mimic NC, miR-503-5p inhibitor negative control for miR-503-5p inhibitor NC; (B) qRT-PCR analysis of genes related with cell cycle; (C) Representative images illustrating the EdU of PK15 cells transfected with miRNA-503-5p mimics or miRNA-503-5p inhibitor; (D) Cells were stained with oil red O, NC is negative control; (E) The expression levels of gene-related adipogenic, fatty acid oxidation and fatty acid transportation synthesis were measured by qRT-PCR. Scale bars 50 μm. All results are presented as means ± SEM (n = 3). \* P < 0.05; \*\* P < 0.01, n.s. no significant difference.
